# Supplementary material for: Review of Systemic Immunosuppression for Autoimmune Uveitis
Source: Springer Nature journal article supplement (doi:10.1007/s40123-014-0023-x), 2014-03-18
Supplement: MOESM1 [file 9339976]

- A diverse collection of medications is available to ophthalmologists for the treatment of autoimmune eye disease. If utilized properly, many exhibit high safety and efficacy profiles.
- It is recommended that treatment occur in a stepwise fashion, from least to more aggressive, and possibly include corticosteroid administration of various forms to quell active inflammation. Classic immunomodulators and newer biologic response modifiers may be employed.
- Corticosteroid monotherapy is almost never curative and carries significant side effects, while immunomodulatory therapy, when used appropriately as way to induce steroid-free remission, carries far less risk of causing long term complications and provides greater potential of altering the immune system to induce a durable remission.
- Emerging therapies represent the newest class of compounds, and were created to diminish side-effect profiles through highly-specific disease targeting. They may exhibit higher rates of efficacy in recalcitrant uveitis patients.
- Although much progress has been made, much work lies ahead of researchers and clinicians seeking a cure for autoimmune uveitis.

This summary slide represents the opinions of the authors. For a full list of acknowledgments and conflicts of interest for all authors of this article, please see the full text online. Copyright © The Authors 2014. Creative Commons Attribution Noncommercial License (CC BY-NC).
